# Supplementary material for: Prediction of Conserved Peptides of Paracoccidioides for Interferon-γ Release Assay: The First Step in the Development of a Lab-Based Approach for Immunological Assessment during Antifungal Therapy
Source: MDPI journal article supplement (doi:10.3390/jof6040379), 2020-12-19
Supplement: s1 [file s1]

Supplementary Materials

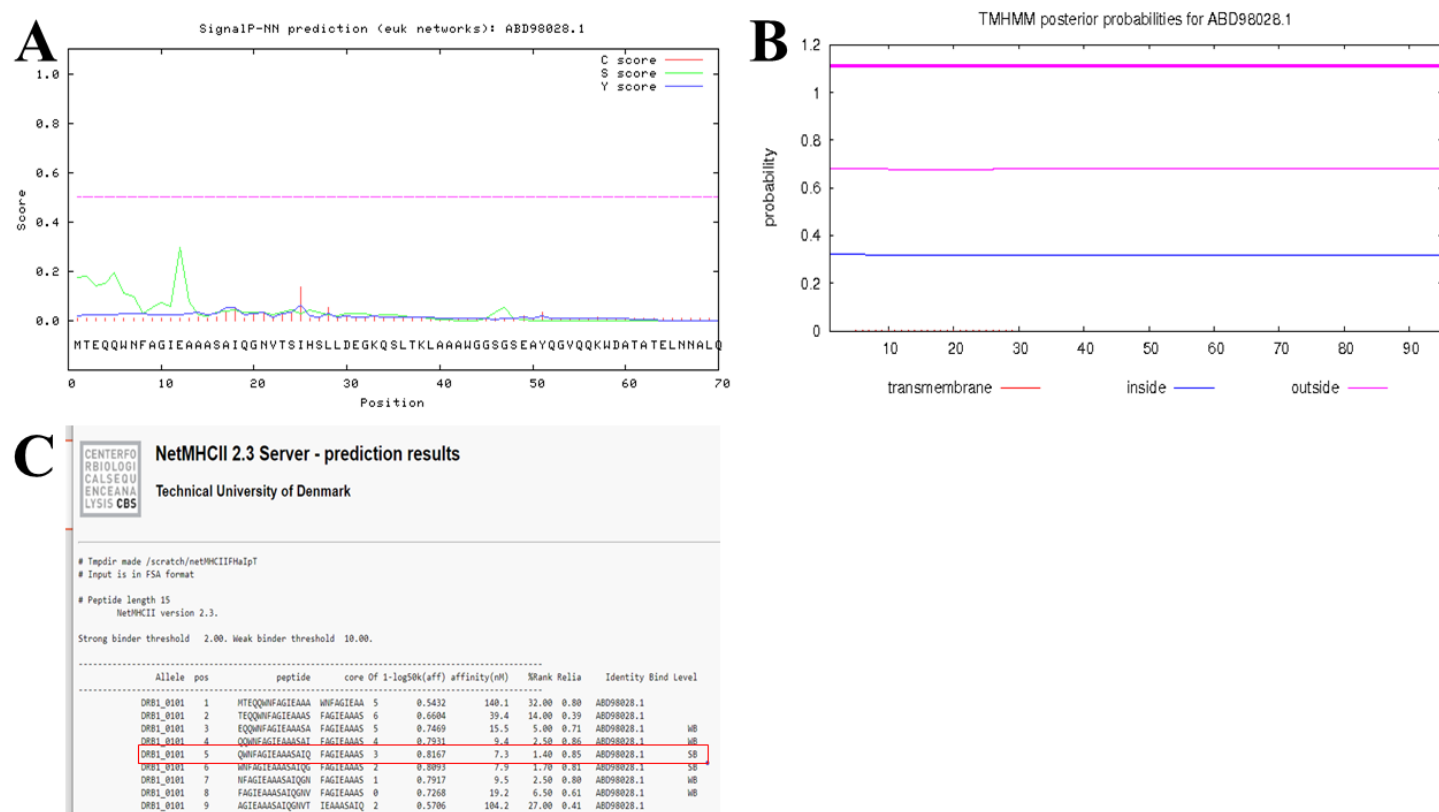

**Figure S1.** Analysis of the interaction of the ESAT-6 protein by integrating different algorithm searches. (A) Signal peptide prediction (SignalP peptide). (B). Prediction of transmembrane regions (TMHMM). (C). Prediction of epitopic regions for MHC II (NetMHCII).
